# Supplementary material for: Wet Synthesis of Elongated Hexagonal ZnO Microstructures for Applications as Photo-Piezoelectric Catalysts
Source: MDPI journal article supplement (doi:10.3390/ma13132938), 2020-06-30
Supplement: s1 [file s1]

# Supplementary Materials: Wet Synthesis of Elongated Hexagonal ZnO Microstructures for Applications as Photo-Piezoelectric Catalysts

Rosanna Pagano <sup>1</sup>, Chiara Ingrosso <sup>2</sup>, Gabriele Giancane <sup>3,4,\*</sup>, Ludovico Valli <sup>1,4</sup> and Simona Bettini <sup>4,5</sup>

<sup>1</sup> Department of Biological and Environmental Sciences and Technologies, DISTEBA, University of Salento, Via per Arnesano, Lecce I-73100, Italy; rosanna.pagano@unisalento.it (R.P.); ludovico.valli@unisalento.it (L.V.)

<sup>2</sup> CNR-IPCF Sez. Bari, c/o Department of Chemistry, University of Bari, via Orabona 4, Bari I-70126, Italy; c.ingrosso@ba.ipcf.cnr.it

<sup>3</sup> Department of Cultural Heritage, University of Salento, Via D. Birago, 48, Lecce I-73100, Italy

<sup>4</sup> Consorzio Interuniversitario Nazionale per la Scienza e Tecnologia dei Materiali, INSTM, Via G. Giusti, 9, Firenze I-50121, Italy; simona.bettini@unisalento.it

<sup>5</sup> Department of Engineering for Innovation, University of Salento, Via per Monteroni, Lecce I-73100, Italy

\* Correspondence: gabriele.giancane@unisalento.it

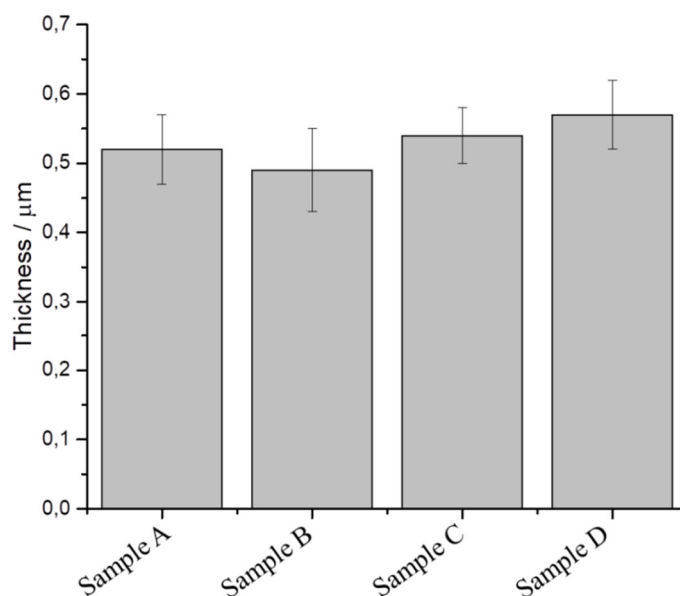

**Figure S1.** Thickness estimation of the samples A, B, C and D. The error bars were calculated as standard deviation of the results obtained repeating the measurement on 5 samples obtained in the same experimental conditions.

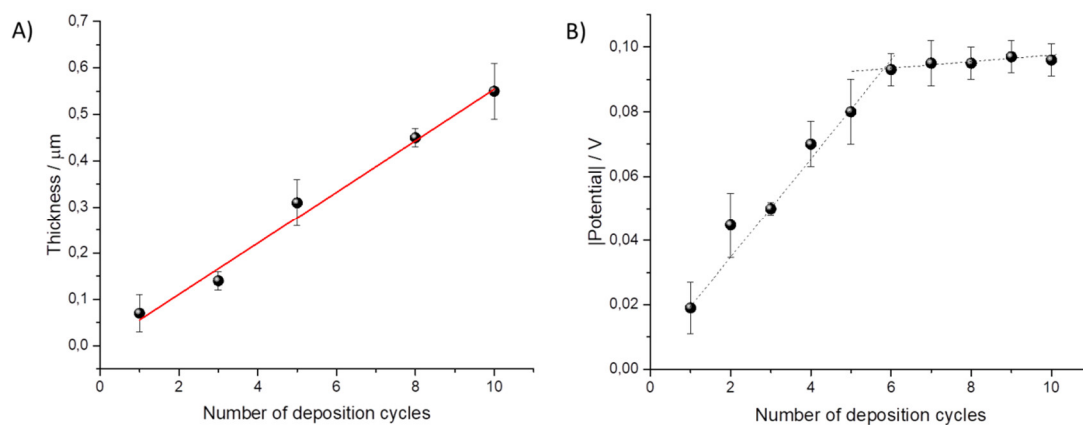

**Figure S2.** A) Thickness estimation of ZnO film as a function of different number of deposition cycles. B) Piezo-potential recorded for samples with different thickness. An asymptotic value can be reached when a thickness of the piezoelectric layers approaches about 0.35  $\mu\text{m}$ .

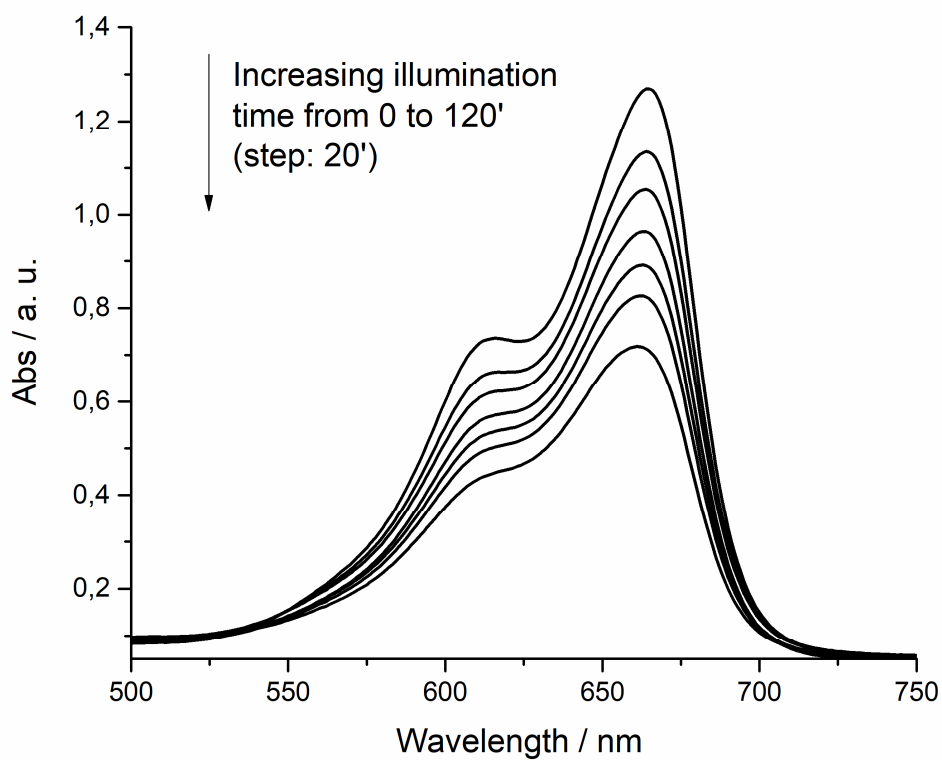

**Figure S3.** Photo-degradation of methylene blue assisted by ZnO powder of sample A.

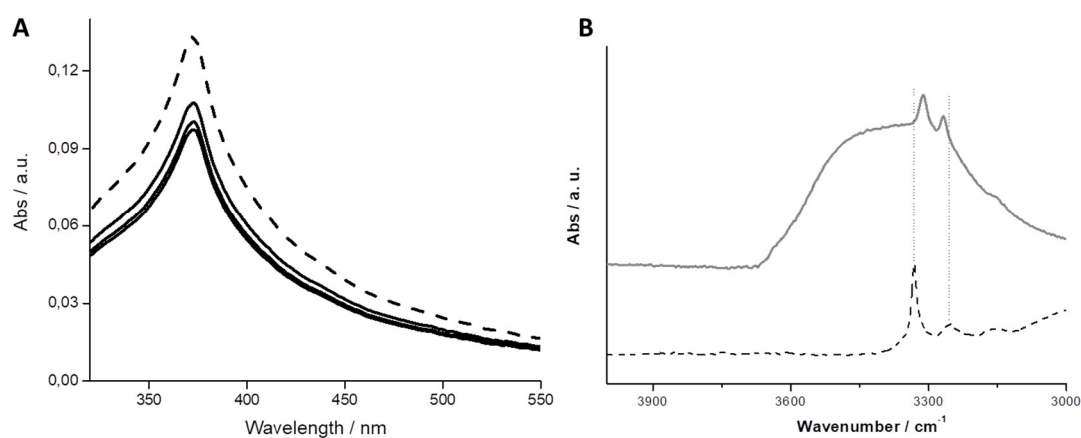

**Figure S4.** **A.** Bleaching of the ZnO absorption peak before the substrate immersion in water (dotted line) and after 10, 20 and 30 minutes immersion (continuous lines). **B.** FTIR spectra at high wavenumber ( $4000\text{--}3000\text{ cm}^{-1}$ ) of ODA thin film and ZnO/ODA multilayer.

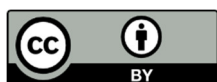

© 2020 by the authors. Submitted for possible open access publication under the terms and conditions of the Creative Commons Attribution (CC BY) license (<http://creativecommons.org/licenses/by/4.0/>).
